# Infection via mosquito bite alters Zika virus replication kinetics in rhesus macaques

Dawn M. Dudley<sup>2</sup>, Christina M. Newman<sup>2</sup>, Joseph Lalli<sup>1</sup>, Laurel M. Stewart<sup>2</sup>, Michelle R. Koenig<sup>2</sup>, Andrea M. Weiler<sup>3</sup>, Matthew R. Semler<sup>2</sup>, Gabrielle L. Barry<sup>3</sup>, Katie R. Zarbock<sup>2</sup>, Mariel S. Mohns<sup>2</sup>, Meghan E. Breitbach<sup>2</sup>, Nancy Schultz-Darken<sup>3</sup>, Eric Peterson<sup>3</sup>, Wendy Newton<sup>3</sup>, Emma L. Mohr<sup>4</sup>, Saverio Capuano III<sup>3</sup>, Jorge E. Osorio<sup>1</sup>, Shelby L. O'Connor<sup>2,3</sup>, David H. O'Connor<sup>2,3</sup>, Thomas C. Friedrich<sup>1,3</sup>, and Matthew T. Aliota<sup>1\*</sup>

<sup>1</sup>Department of Pathobiological Sciences, University of Wisconsin-Madison.

<sup>2</sup>Department of Pathology and Laboratory Medicine, University of Wisconsin-Madison.

<sup>3</sup>Wisconsin National Primate Research Center, University of Wisconsin-Madison.

<sup>4</sup>Department of Pediatrics, University of Wisconsin-Madison.

## Materials and Correspondence

Matthew T. Aliota

Department of Pathobiological Sciences, University of Wisconsin-Madison, Madison, WI 53706

[mtaliota@wisc.edu](mailto:mtaliota@wisc.edu)

## 1 **ABSTRACT**

2 For more than three decades it has been recognized that small amounts of vector saliva can  
3 significantly alter the infectivity of vector-borne pathogens and subsequent *in vivo* dynamics.  
4 Mouse and nonhuman primate models now serve as useful platforms to study Zika virus (ZIKV)  
5 pathogenesis, candidate therapies, and vaccines, but they rely on needle inoculation of virus:  
6 the effects of mosquito-borne infection on disease outcome have not been explored in these  
7 models. To model vector-borne transmission of ZIKV in nonhuman primates, we infected *Aedes*  
8 *aegypti* mosquitoes with ZIKV and allowed them to feed on four ZIKV-naive rhesus macaques.  
9 We compared ZIKV replication kinetics and tissue distribution between animals that were  
10 subcutaneously inoculated with  $10^4$  plaque-forming units of ZIKV and those that were exposed  
11 via mosquito bite. Here, we show that infection via mosquito bite delays ZIKV replication to peak  
12 viral loads in rhesus macaques. Importantly, in mosquito-infected animals ZIKV tissue  
13 distribution was limited to hemolymphatic tissues, female reproductive tract tissues, kidney, and  
14 liver, potentially emulating key features of human ZIKV infections, most of which are  
15 characterized by mild or asymptomatic disease. This newly developed system will be valuable  
16 for studying ZIKV disease because it more closely mimics human infection by mosquito bite  
17 than needle-based inoculations.

## 18 **INTRODUCTION**

19 Zika virus (ZIKV; *Flaviviridae*, *Flavivirus*) is primarily transmitted by *Aedes aegypti* mosquitoes,  
20 but animal models of ZIKV pathogenesis have relied on needle inoculation<sup>1-7</sup>. Needle  
21 inoculation has been performed using a range of doses, delivered subcutaneously at a single  
22 site or at multiple sites, as well as intravenously, intravaginally, intrarectally, and intra-  
23 amniotically in pregnant animals. Each of these routes and inoculum doses could modulate viral  
24 infection kinetics and viral tissue distribution on their own, but none of them entirely recapitulate

25 vector delivery of the virus. Blood feeding by a mosquito ensures delivery of the virus to an  
26 anatomically precise target in the dermis of the skin<sup>8-10</sup>. When a mosquito feeds it inserts its  
27 mouthparts into the skin and then actively probes within the tissue for blood. When blood is  
28 found, the mosquito begins feeding either directly from the vessel or from the resulting  
29 hemorrhage. Importantly, the majority of the inoculum delivered by a mosquito while probing  
30 and feeding is deposited extravascularly<sup>11</sup> and only a small amount ( $\sim 10^2$  plaque-forming units  
31 (PFU)) is deposited intravascularly<sup>12</sup>. Throughout this process, a mosquito injects saliva into the  
32 host. The saliva of hematophages, including mosquitoes, is a cocktail of potent  
33 pharmacologically active components that prevents clotting and causes vasodilation, as well as  
34 alters the inflammatory and immune response, to help facilitate blood feeding<sup>13-15</sup>.

35 Pathogens such as ZIKV exploit this system to infect new vertebrate hosts. Mosquito saliva  
36 enhances the replication and pathogenesis of numerous arthropod-borne viruses<sup>16-21</sup>.  
37 Furthermore, mosquito saliva has been shown to alter virus dissemination in mammalian hosts  
38 for other arboviruses such as dengue virus and Semliki Forest virus<sup>22,23</sup>. Therefore, saliva  
39 delivered to the host by a mosquito may have a critical impact on the initial infection in the skin  
40 and may modulate the local innate and adaptive immune response. Accordingly, needle delivery  
41 may fail to fully recapitulate important biological parameters of natural ZIKV infection. In  
42 addition, the delivery of isolated, purified pathogens by needle inoculation can introduce  
43 significant artifacts into the system: for example, directly inoculated virus stocks contain cell  
44 culture components not found in mosquito saliva. In sum, it is impossible to replicate the  
45 biological, physiological, and mechanical phenomena of mosquito feeding and/or probing using  
46 a needle.

47 The amount of ZIKV inoculated by mosquitoes into a host is not known. In the majority of our  
48 previous studies we used an inoculum dose of  $1 \times 10^4$  PFU injected subcutaneously (sc)<sup>1,2,24</sup>,  
49 which we chose as a dose likely to be delivered by a ZIKV-infected mosquito. This was based

50 on previous studies, which found that mosquitoes delivered  $\sim 1 \times 10^4 - 1 \times 10^6$  PFU of West Nile  
51 virus (WNV) <sup>12</sup> and as much as  $1 \times 10^4$  50% mosquito infectious doses of dengue virus (DENV)  
52 <sup>25</sup>. Other recent studies of ZIKV infection in nonhuman primates have relied on a variety of  
53 doses and routes with varying outcomes. For example, five sc inoculations each containing  $1 \times$   
54  $10^7$  PFU (a 50-fold higher cumulative dose than any other published study) of a Cambodian  
55 strain of ZIKV in a pregnant pigtail macaque (*Macaca nemestrina*) resulted in severe fetal  
56 neurodevelopmental abnormalities not seen in other studies using a smaller dose of different  
57 ZIKV strains <sup>5</sup>. In rhesus and cynomolgus macaques (*Macaca mulatta* and *Macaca fascicularis*,  
58 respectively), ZIKV RNA persisted in saliva and seminal fluids for at least three weeks after  
59 clearance of the virus from the peripheral blood following sc inoculation with  $1 \times 10^6$  PFU of a  
60 Thai ZIKV isolate <sup>26</sup>. Our studies using the same route and doses ranging from  $1 \times 10^4$  to  $1 \times 10^6$   
61 PFU of a French Polynesian isolate showed no persistence in body fluids after the resolution of  
62 acute plasma viremia in non-pregnant macaques <sup>2</sup>. In yet another study in rhesus macaques,  
63 intravenous administration of  $1 \times 10^5$  PFU of a Brazilian ZIKV isolate resulted in a short-lived  
64 plasma viremia and vRNA distribution in a variety of tissues two weeks post-infection <sup>7</sup>.  
65 Together these studies established that Asian/American lineage ZIKV infection of rhesus  
66 macaques provides a relevant animal model for studying natural history and pathogenesis in a  
67 host that has salient similarities to human pregnancy and biology. But they also highlight that  
68 differences in route, dose and virus strain may lead to different outcomes. Although no studies  
69 to date have addressed whether infection via needle inoculation fundamentally differs from  
70 infection via a mosquito vector, transmission of ZIKV via mosquito was attempted in 1956 in  
71 Nigeria, but only seroconversion was observed <sup>27</sup>.

72 Here, we show that ZIKV-infected *Ae. aegypti* can reliably initiate systemic ZIKV infections in  
73 rhesus macaques. To assess differences in ZIKV replication between virus delivery by needle  
74 versus mosquito vector, we infected rhesus macaques with the Puerto Rican ZIKV isolate

75 PRVABC59 by either sc inoculation (n=3) or by exposure to infected mosquitoes (n=4). All three  
76 sc-inoculated macaques were productively infected, with viral load dynamics similar to what we  
77 have reported previously<sup>1,2</sup>. All four animals exposed to *Ae. aegypti* were also productively  
78 infected, with noticeable differences in peak viral load and the time to peak viral load.

## 79 RESULTS

80 ***Mosquito-bite delivery of ZIKV results in systemic infection in macaques.*** To generate  
81 ZIKV-infected mosquitoes, adult female *Ae. aegypti* were fed on ZIKV-infected *Ifnar-/-* mice.  
82 Twelve days (d) post-feeding (PF), these same mosquitoes then were allowed to feed on ZIKV-  
83 naive macaques. All macaques (n=4) exposed to probing and/or feeding of ZIKV-exposed  
84 mosquitoes developed systemic infections as measured by the presence of vRNA in blood  
85 plasma (**Figure 1**). Since not all mosquitoes bite animals under experimental conditions, we  
86 used visual engorgement with blood as a sign of biting and injection of ZIKV. All mosquitoes that  
87 fed took a full bloodmeal (indicated by a fully engorged, distended abdomen) and only those  
88 mosquitoes that fed also probed. One macaque (328696) received 18 bites, one macaque  
89 (349332) received 8 bites, and two macaques (268283 and 458001) received 5 bites. After  
90 macaque feeding, mosquito vector competence for ZIKV was tested on a subset of the same  
91 *Ae. aegypti* (n=40) using an *in vitro* transmission assay<sup>28,29</sup> at 12 d PF, the same time point as  
92 the mosquitoes fed on the macaques. As expected, the infection (90%) and dissemination  
93 (83%) rates were high for *Ae. aegypti* exposed to ZIKV-infected mice, while the transmission  
94 rate was more moderate (25%; **Table 1**). Infection efficiency indicates the proportion of  
95 mosquitoes with virus-positive bodies among the tested ones. Dissemination efficiency indicates  
96 the proportion of mosquitoes with virus-positive legs, and transmission efficiency indicates the  
97 proportion of mosquitoes with infectious saliva among the tested ones. We used plaque assays  
98 on collected saliva to estimate the ZIKV dose inoculated by mosquitoes and found that *Ae.*  
99 *aegypti* saliva titers ranged from 10<sup>1.5</sup> to 10<sup>3.2</sup> PFU (**Figure 2**). Importantly, collection of

100 mosquito saliva via capillary feeding does not allow mosquitoes to probe and feed naturally and  
101 therefore likely underestimates the dose of virus inoculated. In fact, mosquitoes probing and  
102 feeding on a living host delivered doses of other flaviviruses that were 10- to 1000-fold higher  
103 than those measured using *in vitro* methods<sup>12</sup>.

104 ***Mosquito-bite infection results in a delay to peak viral load.*** To examine whether viral  
105 replication kinetics differed between virus delivery from a needle and delivery from a mosquito  
106 vector, we compared viral load dynamics in sc-inoculated animals and animals infected via  
107 mosquito bites. There were noticeable differences in peak viral load and the time to peak viral  
108 load (**Figure 1**). Viral loads in macaques sc-inoculated with  $1 \times 10^4$  PFU of ZIKV-PR peaked in  
109 all three animals at 3 dpi, and ranged from  $9.32 \times 10^4$  to  $3.85 \times 10^5$  vRNA copies/ml, while viral  
110 loads peaked at 5 or 6 dpi and ranged from  $5.83 \times 10^4$  to  $4.40 \times 10^6$  vRNA copies/ml in animals  
111 that received mosquito bites. Peak viral loads did not differ significantly (Student's t-test)  
112 between sc-inoculated animals and mosquito-bitten animals (p-value=0.305, t-value=1.144,  
113 df=5); however, peak viral load occurred significantly faster in sc-inoculated animals (linear  
114 mixed-effects model; p-value=0.006, t-value=-7.606, df=5). Antibody responses were generated  
115 rapidly in both sc-inoculated and mosquito-bitten animals, with detectable changes in IgM as  
116 early as 10 dpi (**Supplementary Table 1**).

117 ***ZIKV tissue distribution in mosquito-challenged animals is similar to sc-inoculated***  
118 ***animals.*** To assess whether vRNA levels and tissue tropism differed after virus delivery from  
119 needle versus delivery by mosquito vector, we used qRT-PCR to measure ZIKV RNA in  
120 homogenized macaque tissues. At 15 dpi, both sc-inoculated and mosquito-bite challenged  
121 animals were euthanized and tissues collected. In mosquito-bitten animals hemolymphatic  
122 tissues contained the highest levels of detectable vRNA. Lymph nodes and spleen were the  
123 most highly positive, ranging from  $3.1 \times 10^2$  to  $1.8 \times 10^5$  vRNA copies/mg of tissue at 15 days  
124 PF (**Figure 3**). Kidney and liver also were positive; and in the female animal, 458001,

125 reproductive tract tissues were positive (**Figure 3**). Notably brain, ocular, and male reproductive  
126 tract tissues from all animals contained no detectable vRNA (see **Table 2** for a list of all tissues  
127 collected and screened). In sc-inoculated animals, hemolymphatic tissues also contained the  
128 highest levels of detectable vRNA in both animals (one animal was excluded because tissues  
129 were not collected with sterile instruments). Similar to mosquito bitten animals, kidney, liver, and  
130 female reproductive tract tissues also contained detectable vRNA; whereas, male reproductive  
131 tract tissues contained no detectable ZIKV RNA. In contrast to mosquito bitten animals, ZIKV  
132 RNA was detected in the cerebrum of 566628 and the eye of both sc-inoculated animals  
133 (**Figure 3**).

134 ***Mosquito transmission alters ZIKV populations in macaques.*** To characterize the genetic  
135 diversity of viral populations transmitted by mosquitoes, we used Illumina deep sequencing to  
136 identify single-nucleotide polymorphisms (SNPs) in viral populations present in the viral open  
137 reading frame in the ZIKV-PRVABC59 stock, in monkeys infected by mosquito bite, and in  
138 saliva of individual mosquitoes (collected by capillary tubes, n=8; two samples were excluded  
139 because of low vRNA concentration) that fed on mice infected with the same virus stock and  
140 were verified as transmission-competent in our *in vitro* assay (**Figure 2, Supplementary Table**  
141 **3**). For comparison, we characterized viral SNPs in the 3 monkeys infected by sc injection with  $1$   
142  $\times 10^4$  PFU of the same virus stock. ZIKV sequences from these samples were assembled to a  
143 ZIKV-PRVABC59 reference sequence (Genbank KU501215). Across all samples, we detected  
144 42 SNPs occurring in one or more samples at a frequency of  $\geq 5\%$  throughout the viral coding  
145 genome (**Figure 4**). Of these, 9 SNPs occurred in structural genes, 33 in nonstructural genes. In  
146 sc-infected monkeys, the frequency and distribution of viral SNPs were highly similar among  
147 infected animals and closely resembled those observed in the stock virus (**Figure 4A**). By  
148 contrast, viral populations in infected mosquitoes, and in monkeys infected by these  
149 mosquitoes, showed a heterogeneous pattern of SNPs, with fewer SNPs shared among

150 samples (**Figure 4B-C**). Furthermore, mosquito transmission appeared to alter the frequencies  
151 of SNPs observed in the ZIKV-PRVABC59 stock virus: for example, a mutation at reference  
152 nucleotide 3147 causing a methionine-to-threonine substitution at position 220 of NS1 (NS1  
153 M220T) was at high frequency in multiple mosquito samples and in all monkeys infected by  
154 mosquito bite, but it remained below 15% frequency in the virus stock and in all animals infected  
155 by sc injection. Conversely, a C-to-T mutation at nucleotide 5679 encoding NS3 S356F was  
156 present in ~65% of stock viruses and in 40-60% of viruses infecting sc-inoculated animals, but  
157 this same mutation was detected in only one mosquito pool and is absent from all animals  
158 infected by mosquito bite.

159 Mosquitoes feed on small volumes of blood from infected hosts, limiting the size of the viral  
160 population founding infection in the vector. Also, during replication in mosquitoes, flaviviruses  
161 undergo population bottlenecks as they traverse physical barriers like the midgut<sup>30,31</sup>. We  
162 therefore reasoned that viral genetic diversity in mosquitoes and monkeys infected by mosquito  
163 bite would be low as compared with the virus stock and populations in sc-inoculated monkeys.  
164 To test this prediction, we measured within-host viral diversity using the  $\pi$  statistic, which  
165 quantifies the number of pairwise differences between sequences without regard to a specific  
166 reference. We calculated  $\pi$  for each gene encoding a mature viral protein in each sample  
167 (except for protein 2K and NS4A, where coverage was not deep enough in each sample to  
168 allow for rigorous comparisons). Consistent with our expectations, our analysis showed that viral  
169 diversity tended to be lowest in infected mosquitoes, and highest in the virus stock and sq-  
170 inoculated animals (**Supplemental Figure 1**). Differences in diversity were most pronounced in  
171 the capsid gene, where  $\pi$  was significantly lower in mosquito pools and mosquito-infected  
172 monkeys than in monkeys inoculated sc, but significant differences between groups were also  
173 found in most other viral genes (**Supplemental Figure 1**). Finally, we asked how natural  
174 selection might be shaping virus populations in infected mosquitoes and monkeys. The



175 magnitude and direction of natural selection on virus populations can be inferred by comparing  
176 within-host levels of synonymous and nonsynonymous nucleotide diversity, denoted  
177 respectively as  $\pi_S$  and  $\pi_N$ . In general,  $\pi_S > \pi_N$  indicates that purifying selection is acting to  
178 remove deleterious mutations, while  $\pi_S < \pi_N$  indicates that positive or diversifying selection is  
179 acting to favor the outgrowth of new viral variants. We therefore compared the magnitude of  $\pi_N$   
180 and  $\pi_S$  in each viral gene across experimental groups.  $\pi_S$  was significantly greater than  $\pi_N$  in  
181 multiple nonstructural genes in sc-inoculated monkeys, suggesting that virus populations were  
182 largely under purifying selection (**Supplementary Figure 2**). In contrast, we find evidence for  
183 purifying selection in mosquito-infected monkeys only in capsid and NS5, and only in NS5 in  
184 mosquitoes themselves. Taken together, our data show that ZIKV populations in mosquito-  
185 infected monkeys exhibit more inter-host variability (i.e., different combinations of SNPs) than in  
186 sc-inoculated monkeys, perhaps due to sharp viral population reductions during mosquito  
187 infection. We do not find evidence for strong natural selection acting at the gene level in  
188 mosquitoes or mosquito-infected monkeys, suggesting that reduced diversity results from  
189 random population bottlenecks rather than selection for particular variants.

190 ***ZIKV-infected rhesus macaques do not develop sufficient viremia to infect mosquitoes.***

191 To better understand ZIKV transmission dynamics, *Ae. aegypti* vector competence for ZIKV  
192 from macaques was evaluated at days 7, 13, and 25 d PF from mosquitoes that fed on sc-  
193 inoculated animals and days 13 and 25 from mosquitoes that fed on mosquito-infected animals.  
194 All samples from mosquitoes that fed on sc-inoculated animals were negative for ZIKV by  
195 plaque assay at all time points (**Table 3**). A single *Ae. aegypti* that fed on animals infected by  
196 mosquito bite had a disseminated ZIKV infection at d 25 PF, but this mosquito was not capable  
197 of transmitting the virus as measured by plaque assay (**Table 3**). These data are consistent with  
198 field epidemiological reports, which estimated mosquito infection rates during ZIKV outbreaks to  
199 be 0.061%<sup>32</sup> and also are consistent with infection rates during DENV and chikungunya

200 outbreaks<sup>33</sup>. It should also be noted that *Ae. aegypti* with poor competence but high population  
201 density have been capable of sustaining outbreaks of arboviral diseases such as yellow fever<sup>34</sup>.

## 202 **DISCUSSION**

203 In 1956 in Nigeria, investigators attempted to transmit ZIKV to a healthy rhesus monkey by  
204 exposing it to mosquitoes that had fed on ZIKV-infected mouse blood. The animal remained  
205 healthy, and no virus was detected in blood, but the animal apparently developed antibodies to  
206 ZIKV (no data were shown). As a result, it was concluded that ZIKV transmission was  
207 achieved<sup>27</sup>. But beyond this single manuscript, mosquito-bite delivery of ZIKV for laboratory  
208 studies has not been reported in the literature. Here we demonstrate, for the first time, to our  
209 knowledge, that systemic infection in nonhuman primates can result from mosquito-bite delivery  
210 of ZIKV. This work thus establishes a nonhuman primate model for vector-borne ZIKV  
211 transmission. Using this model, we observed a significant delay to peak viremia when virus was  
212 delivered by mosquito as compared to subcutaneous needle inoculation. While viral genetic  
213 composition and diversity levels in sc-inoculated monkeys largely mirrored those of the stock  
214 virus, we observed a trend toward decreased genetic diversity in virus populations infecting  
215 mosquitoes and the monkeys infected by them. Mosquito infection appeared to alter the  
216 frequencies of SNPs in the ZIKV population as compared with the stock virus. We found no  
217 evidence that selection favored specific variants in mosquito transmission; instead, we observed  
218 a more heterogeneous distribution of viral SNPs in mosquito-infected monkeys than in sc-  
219 inoculated animals. These findings are consistent with the observation that arboviruses undergo  
220 multiple population bottlenecks in infected mosquitoes<sup>30,31</sup>; as a result, different mosquitoes  
221 could transmit different founder populations to different macaques. The low number of viral  
222 genome copies isolated from mosquito saliva, together with the differing patterns of SNPs  
223 observed among mosquito-bitten macaques, are also consistent with the interpretation that  
224 mosquito transmission involves a random viral population bottleneck. A recent study of DENV

225 evolution in mosquitoes found evidence for both random population bottlenecks and purifying  
226 selection as the virus replicated in mosquitoes and crossed anatomical barriers<sup>30</sup>. Our data  
227 reveal only limited evidence of purifying selection on ZIKV populations sequenced from  
228 mosquito saliva (indeed, we observed the strongest signals of purifying selection in viruses  
229 infecting sc-inoculated monkeys), but our study investigated virus populations at single  
230 timepoints in infected macaques and mosquitoes and was therefore not powered to carefully  
231 evaluate within-host selection on virus populations over time. There is no evidence in our data  
232 suggesting that differences in the genetic composition of viruses infecting mosquito-bitten  
233 macaques resulted in phenotypic differences in, e.g., disease severity or dissemination of virus  
234 to different tissues, but if the source virus population encoded broader phenotypic diversity it is  
235 possible that founder effects associated with mosquito transmission could result in  
236 phenotypically different infections in different hosts.

237 It is well established that mosquito transmission can affect arbovirus infection outcomes, but  
238 outcomes vary depending on the mosquito-virus-host system<sup>11,12,17,35</sup>. In this study we found a  
239 single sc dose of  $1 \times 10^4$  PFU of ZIKV led to similar tissue distribution as observed in mosquito-  
240 inoculated animals at 15 dpi. Although a single sc inoculation may not perfectly model vector-  
241 borne transmission of ZIKV, we anticipate that sc inoculation will continue to be valuable for  
242 studying ZIKV pathogenesis. Needle inoculation remains an important option when it is  
243 necessary to control the exact dose delivered, but the dose and number of sc inoculations could  
244 alter virus distribution and replication kinetics. For example, several recent studies using needle  
245 inoculation detected a broad ZIKV RNA tissue distribution, including in reproductive organs, the  
246 CNS, and brain<sup>7,26,36,37</sup>. Likewise, we also found evidence of ZIKV infection of the brain and eye  
247 in our needle inoculated animals. In contrast, animals challenged by mosquito bite had no  
248 evidence of infection of the brain or CNS 15 dpi. Furthermore, similar to what has been  
249 described for human infections (i.e., that most cases are asymptomatic), none of the animals

250 studied here displayed any of the hallmark symptoms (e.g., fever, maculopapular rash,  
251 conjunctivitis, etc.) that have been associated with overt Zika fever or those that have been  
252 associated with neurologic disease in adults in rare instances (e.g., Guillain-Barré  
253 syndrome<sup>38,39</sup>, encephalitis, meningoencephalitis, and myelitis<sup>40</sup>); therefore, outcomes observed  
254 here may more closely parallel what has been reported during adult human infections.

255 It is theoretically possible that the differences in disease outcomes and virus distribution  
256 observed in our study relative to the other studies may be due to the use of a specific strain,  
257 dose, or host species. However, many of the published studies used the same Puerto Rican  
258 ZIKV strain used in our study. Asian/American lineage outbreak strains share >99% genome-  
259 wide nucleotide identity<sup>41</sup>, but virus stocks prepared at different centers, while nominally the  
260 same strain, have different passage histories, which could result in small, but biologically  
261 important, genotypic and phenotypic differences. Another possible explanation for the disparity  
262 in outcomes is the inoculation route. For example, iv inoculation likely resulted in antigen  
263 presentation to many lymph nodes simultaneously, likely promoting faster innate immune  
264 responses and faster clearance of virus from the peripheral blood<sup>7</sup>. Subcutaneous inoculation,  
265 by contrast, likely resulted in slower dissemination through the draining lymph nodes;  
266 dissemination may be slower still following mosquito infection, as indicated by the delay in peak  
267 viral loads observed with mosquito-bite delivery of virus in this study. In addition, the use of  
268 multiple simultaneous injections<sup>36</sup> could iatrogenically cause disease signs<sup>17</sup>. For example, the  
269 fever response observed with multiple injections might be expected, given that injection of virus  
270 stocks also delivers cell culture medium components that might serve as irritants; needle  
271 puncture of the skin is also more traumatic than insertion of a mosquito proboscis. Accordingly,  
272 needle inoculation of DENV resulted in significantly elevated temperatures in the humanized  
273 mouse model as compared to mice infected with DENV via mosquito bite<sup>17</sup>. Notably, our sc-  
274 inoculated animals did not have elevated body temperatures.

275 Surprisingly, in our experiments no *Ae. aegypti* (with the exception of a single mosquito that fed  
276 on a mosquito-bite inoculated animal) became infected with ZIKV after feeding on ZIKV-viremic  
277 macaques. This was likely the result of the low amount of infectious virus in macaque blood.  
278 Our previous studies indicate that the PFU:particle ratio for ZIKV in our system is  $\sim 1:1000^2$  and  
279 therefore infectious bloodmeal titers for mosquito feeding experiments were  $<4.0 \log_{10}$  PFU/ml.  
280 It is likely that mosquito vectors do not become efficiently infected when ZIKV titers are low, and  
281 higher viral titers in the bloodmeal increase the probability of mosquito infection<sup>42</sup>. The exact  
282 threshold viremia that results in productive mosquito infection remains unknown, but a recent  
283 study used artificial membrane feeding to establish a minimum infective dose of  $4.2 \log_{10}$   
284 PFU/ml for susceptibility in mosquitoes<sup>42</sup>. It should be noted that viral loads in macaque plasma  
285 resemble those reported in humans in endemic areas<sup>32,43–45,46</sup>. Furthermore, the first clinical  
286 description of a patient suffering from Zika fever was reported in 1956, and was based on a  
287 ZIKV infection experimentally induced in a human volunteer<sup>47</sup>. The patient was a 34-year-old  
288 European male infected sc with 265 50% mouse lethal doses of the strain of ZIKV isolated in  
289 Nigeria in 1954. His first symptoms were fever and a slight headache 3.5 days after inoculation.  
290 The headache lasted approximately two days. A rash was not recorded. The patient also was  
291 exposed to female *Ae. aegypti* mosquitoes during the acute stage of illness, and similar to what  
292 is described here, ZIKV was not recovered from these mosquitoes, perhaps due to low  
293 viremia<sup>47</sup>.

294 We established a mosquito infection model of ZIKV in nonhuman primates to understand the  
295 impact of mosquito transmission on ZIKV pathogenesis. Here we used the rhesus macaque  
296 because it is a well-studied translational model for viral pathogenesis and for preclinical  
297 evaluation of countermeasures, including during pregnancy. However, the approaches we  
298 describe to achieve mosquito transmission of ZIKV in the laboratory have many other  
299 applications. For example, mosquito transmission models using New-World NHP could help

300 predict the likelihood of establishing sylvatic ZIKV cycles in the Americas. Parallel studies  
301 should also evaluate vector competence of New World mosquito species, particularly those  
302 vectors that may have the capacity to maintain sylvatic cycles (e.g., *Sabethes spp.* and  
303 *Haemogogus spp.*) and those that may be capable of bridging sylvatic and urban cycles (e.g.,  
304 *Aedes albopictus*)<sup>48</sup>. These mosquito species may have a lower threshold to infection as  
305 compared to *Ae. aegypti*, but this will require further laboratory confirmation.

306 Needle inoculation of arboviruses does not faithfully recapitulate the complex factors involved in  
307 vector-borne transmission, which can have important impacts on disease pathogenesis. In our  
308 study 4/4 animals were infected in a single feeding session, suggesting that mosquito delivery of  
309 ZIKV in nonhuman primates provides a tractable animal model of natural transmission that can  
310 be applied to many other mosquito-borne pathogens. For example, studies comparing the  
311 course of infection and the immune response between DENVs delivered by mosquito versus  
312 needle could be important for defining the quality of the immune response to dengue where both  
313 the mosquito vector and enhancing antibodies should be considered<sup>18</sup>. Ultimately, these same  
314 approaches may be useful for testing the safety and efficacy of vaccine and therapeutic  
315 candidates: previous reports have demonstrated that *Leishmania* vaccines that protected  
316 against needle challenge failed against sandfly-bite challenge<sup>49,50</sup> and a blood-stage malaria  
317 vaccine was shown to be ineffective against mosquito-bite challenge in humans<sup>51</sup>, underscoring  
318 the importance of studying pathogenic outcomes following natural exposure to a pathogen.  
319 Eventually these approaches could even be extended beyond mosquitoes to pathogens whose  
320 vectors share similar blood feeding strategies, such as tick-borne viruses.

## 321 **MATERIALS AND METHODS**

322 **Study Design.** This study was designed as a proof of concept study to examine whether  
323 subcutaneous inoculation of ZIKV fundamentally differs from mosquito bite delivery of ZIKV in

324 the rhesus macaque model. Available animals were allocated into experimental groups  
325 randomly with both groups containing male and female animals. Investigators were not blinded  
326 to experimental groups.

327 **Ethical approval.** This study was approved by the University of Wisconsin-Madison Institutional  
328 Animal Care and Use Committee (Animal Care and Use Protocol Number G005401 and  
329 V5519).

330 **Nonhuman primates.** Five male and two female, Indian-origin rhesus macaques utilized in this  
331 study were cared for by the staff at the Wisconsin National Primate Research Center (WNPRC)  
332 in accordance with the regulations, guidelines, and recommendations outlined in the Animal  
333 Welfare Act, the Guide for the Care and Use of Laboratory Animals, and the Weatherall report.  
334 In addition, all macaques utilized in the study were free of Macacine herpesvirus 1, Simian  
335 Retrovirus Type D, Simian T-lymphotropic virus Type 1, and Simian Immunodeficiency Virus.  
336 For all procedures, animals were anesthetized with an intramuscular dose of ketamine  
337 (10mL/kg). Blood samples were obtained using a vacutainer or needle and syringe from the  
338 femoral or saphenous vein.

339 **Cells and viruses.** African Green Monkey kidney cells (Vero; ATCC #CCL-81) were maintained  
340 in Dulbecco's modified Eagle medium (DMEM) supplemented with 10% fetal bovine serum  
341 (FBS; Hyclone, Logan, UT), 2 mM L-glutamine, 1.5 g/L sodium bicarbonate, 100 U/ml penicillin,  
342 100 µg/ml of streptomycin, and incubated at 37°C in 5% CO<sub>2</sub>. *Aedes albopictus* mosquito cells  
343 were (C6/36; ATCC #CRL-1660) were maintained in DMEM supplemented with 10% fetal  
344 bovine serum (FBS; Hyclone, Logan, UT), 2 mM L-glutamine, 1.5 g/L sodium bicarbonate, 100  
345 U/ml penicillin, 100 µg/ml of streptomycin, and incubated at 28°C in 5% CO<sub>2</sub>. Cell lines were  
346 obtained from American Type Culture Collection (ATCC), were not further authenticated, and  
347 were not specifically tested for mycoplasma. ZIKV strain PRVABC59 (ZIKV-PR;

348 GenBank:KU501215), originally isolated from a traveler to Puerto Rico with three rounds of  
349 amplification on Vero cells, was obtained from Brandy Russell (CDC, Ft. Collins, CO). Virus  
350 stocks were prepared by inoculation onto a confluent monolayer of C6/36 mosquito cells with  
351 two rounds of amplification. A single harvest with a titer of  $1.58 \times 10^7$  plaque forming units (PFU)  
352 per ml (equivalent to  $2.01 \times 10^{10}$  vRNA copies per ml) of Zika virus/H.sapiens-  
353 tc/PUR/2015/PRVABC59-v3c2 were used for challenges. We deep sequenced the challenge  
354 stock to verify the expected origin (see details in a section below). The ZIKV challenge stock  
355 sequence matched the GenBank sequence (KU501215) of the parental virus, but there were  
356 five sites where between 5 and 92% of sequences contained variants that appear to be  
357 authentic (four out of five were non-synonymous changes; **Supplementary Table 2**).

358 **Mosquito strains and colony maintenance.** The *Aedes aegypti* black-eyed Liverpool (LVP)  
359 strain used in this study was obtained from Lyric Bartholomay (University of Wisconsin-Madison,  
360 Madison, WI) and maintained at the University of Wisconsin-Madison as previously described<sup>52</sup>.  
361 *Ae. aegypti* LVP are ZIKV transmission competent<sup>28</sup>.

362 **Subcutaneous inoculations.** The ZIKV-PR stock was thawed, diluted in PBS to  $1 \times 10^4$   
363 PFU/mL, and loaded into a 3mL syringe maintained on ice until inoculation. For subcutaneous  
364 inoculations (sc), each of three Indian-origin rhesus macaques was anesthetized and inoculated  
365 subcutaneously over the cranial dorsum with 1mL virus stock containing  $1 \times 10^4$  PFU. All  
366 animals were closely monitored by veterinary and animal care staff for adverse reactions and  
367 signs of disease. Animals were examined, and blood, urine, oral swabs, and saliva were  
368 collected from each animal daily from 1 through 10 days, and 14 days post inoculation (dpi), and  
369 beginning on the fifteenth day animals were humanely euthanized and necropsied.

370 **Mosquito bite challenges.** Mosquitoes were exposed to ZIKV by feeding on isoflurane  
371 anesthetized ZIKV-infected *Ifnar*<sup>-/-</sup> mice, which develop sufficiently high ZIKV viremia to infect



372 mosquitoes<sup>28,29</sup>. *Ifnar*<sup>-/-</sup> on the C57BL/6 background were bred in the pathogen-free animal  
373 facilities of the University of Wisconsin-Madison School of Veterinary Medicine. Two male and  
374 two female four-week-old mice were used for mosquito exposures. Mice were inoculated in the  
375 left, hind foot pad with  $1 \times 10^6$  PFU of ZIKV in 50  $\mu$ l of sterile PBS. Three- to six-day-old female  
376 mosquitoes were allowed to feed on mice two days post infection at which time sub-mandibular  
377 blood draws were performed and serum was collected to verify viremia. These mice yielded an  
378 infectious bloodmeal concentration of  $5.64 \log_{10}$  PFU per ml  $\pm$  0.152 (mean  $\pm$  standard  
379 deviation). Mosquitoes that fed to repletion were randomized, separated into cartons in groups  
380 of 10-50, and maintained on 0.3 M sucrose in an environmental chamber at  $26.5^\circ\text{C} \pm 1^\circ\text{C}$ , 75%  
381  $\pm$  5% relative humidity, and with a 12 hour photoperiod within the Department of Pathobiological  
382 Sciences BSL3 Insectary Facility at the University of Wisconsin-Madison. Eleven days later,  
383 following oviposition, ZIKV-exposed mosquitoes were sucrose starved for 14 to 16 hours and on  
384 the twelfth day mosquitoes were exposed to naive, ketamine anesthetized macaques. The  
385 mesh top of a 0.6 L carton containing 10-50 ZIKV-exposed mosquitoes (numbers varied to  
386 ensure feeding success) was placed in contact with the left forearm of each of four macaques.  
387 The forearm was chosen because there was little hair to obstruct mosquito feeding, it could  
388 easily be placed on top of the mosquito carton, and mosquitoes could be easily monitored  
389 during the feeding. Mosquitoes were allowed to probe and feed on the forearm for five minutes.  
390 Mosquitoes were monitored during feedings and the number of mosquitoes that probed and the  
391 blood engorgement status of each mosquito were recorded. ZIKV infection, dissemination, and  
392 transmission status was confirmed in a subset of 40 mosquitoes as described in a subsequent  
393 section. As described previously, animals were examined, and blood, urine, and oral swabs  
394 were collected from each animal daily during challenge. Non or the mosquito-bite challenged  
395 animals exhibited cutaneous reactions to mosquito bites and bites were not associated with  
396 itching.

397 **Vector competence.** Infection, dissemination, and transmission rates were determined for  
398 individual mosquitoes and sample sizes were chosen using long established procedures<sup>28,29,43</sup>.  
399 Mosquitoes that fed to repletion on macaques were randomized and separated into cartons in  
400 groups of 40-50 and maintained as described in a previous section. All samples were screened  
401 by plaque assay on Vero cells. Dissemination was indicated by virus-positive legs. Transmission  
402 was defined as release of infectious virus with salivary secretions, i.e., the potential to infect  
403 another host, and was indicated by virus-positive salivary secretions.

404 **Plaque assay.** All ZIKV screens from mosquito tissues and titrations for virus quantification  
405 from mouse serum or virus stocks were completed by plaque assay on Vero cell cultures.  
406 Duplicate wells were infected with 0.1 ml aliquots from serial 10-fold dilutions in growth media  
407 and virus was adsorbed for one hour. Following incubation, the inoculum was removed, and  
408 monolayers were overlaid with 3 ml containing a 1:1 mixture of 1.2% oxoid agar and 2X DMEM  
409 (Gibco, Carlsbad, CA) with 10% (vol/vol) FBS and 2% (vol/vol) penicillin/streptomycin. Cells  
410 were incubated at 37 °C in 5% CO<sub>2</sub> for four days for plaque development. Cell monolayers then  
411 were stained with 3 ml of overlay containing a 1:1 mixture of 1.2% oxoid agar and 2X DMEM  
412 with 2% (vol/vol) FBS, 2% (vol/vol) penicillin/streptomycin, and 0.33% neutral red (Gibco). Cells  
413 were incubated overnight at 37 °C and plaques were counted.

414 **Viral RNA isolation.** Plasma was isolated from EDTA-anticoagulated whole blood collected the  
415 same day by Ficoll density centrifugation at 1860 rcf for 30 minutes. Plasma was removed to a  
416 clean 15mL conical tube and centrifuged at 670 rcf for an additional 8 minutes to remove  
417 residual cells. Viral RNA was extracted from 300µL plasma using the Viral Total Nucleic Acid Kit  
418 (Promega, Madison, WI) on a Maxwell 16 MDx instrument (Promega, Madison, WI). Tissues  
419 were processed with RNeasy® (Invitrogen, Carlsbad, CA) according to the manufacturer's  
420 protocols. Viral RNA was isolated from the tissues using the Maxwell 16 LEV simplyRNA Tissue  
421 Kit (Promega, Madison, WI) on a Maxwell 16 MDx instrument. A range of 20-40 mg of each

422 tissue was homogenized using homogenization buffer from the Maxwell 16 LEV simplyRNA  
423 Tissue Kit, the TissueLyser (Qiagen, Hilden, Germany) and two 5 mm stainless steel beads  
424 (Qiagen, Hilden, Germany) in a 2 ml snap-cap tube, shaking twice for 3 minutes at 20 Hz each  
425 side. The isolation was continued according to the Maxwell 16 LEV simplyRNA Tissue Kit  
426 protocol, and samples were eluted into 50 µl RNase free water. RNA was then quantified using  
427 quantitative RT-PCR. If a tissue was negative by this method, a duplicate tissue sample was  
428 extracted using the Trizol™ Plus RNA Purification kit (Invitrogen, Carlsbad, CA). Because this  
429 purification kit allows for more than twice the weight of tissue starting material, there is an  
430 increased likelihood of detecting vRNA in tissues with low viral loads. RNA then was re-  
431 quantified using the same quantitative RT-PCR assay. Viral load data from plasma are  
432 expressed as vRNA copies/mL. Viral load data from tissues are expressed as vRNA copies/mg  
433 tissue.

434 **Quantitative reverse transcription PCR (qRT-PCR).** For ZIKV-PR, vRNA from plasma and  
435 tissues was quantified by qRT-PCR using primers with a slight modification to those described  
436 by Lanciotti et al. to accommodate African lineage ZIKV sequences<sup>53</sup>. The modified primer  
437 sequences are: forward 5'-CGYTGCCCAACACAAGG-3', reverse 5'-  
438 CACYAAYGTTCTTTTGCABACAT-3', and probe 5'-6fam-  
439 AGCCTACCTTGAYAAGCARTCAGACACYCAA-BHQ1-3'. The RT-PCR was performed using  
440 the SuperScript III Platinum One-Step Quantitative RT-PCR system (Invitrogen, Carlsbad, CA)  
441 on a LightCycler 480 instrument (Roche Diagnostics, Indianapolis, IN). The primers and probe  
442 were used at final concentrations of 600 nm and 100 nm respectively, along with 150 ng random  
443 primers (Promega, Madison, WI). Cycling conditions were as follows: 37°C for 15 min, 50°C for  
444 30 min and 95°C for 2 min, followed by 50 cycles of 95°C for 15 sec and 60°C for 1 min. Viral  
445 RNA concentration was determined by interpolation onto an internal standard curve composed  
446 of seven 10-fold serial dilutions of a synthetic ZIKV RNA fragment based on a ZIKV strain

447 derived from French Polynesia that shares >99% similarity at the nucleotide level to the Puerto  
448 Rican strain used in the infections described in this manuscript.

449 ***Macaque necropsy.*** Following infection with ZIKV-PR via sc-inoculation or mosquito-bite,  
450 macaques were sacrificed at ~15 days post-feeding or post needle inoculation for all animals.  
451 Tissues were carefully dissected using sterile instruments that were changed between each  
452 organ and tissue type to minimize possible cross contamination. Unfortunately, tissues from one  
453 subcutaneously inoculated animal (634675) were not collected with sterile instruments and was  
454 therefore excluded from tissue analysis. For each of the two remaining animals infected by sc-  
455 inoculation (566628 and 311413) and all four animals infected by mosquito bite, each  
456 organ/tissue was evaluated grossly *in situ*, removed with sterile instruments, placed in a sterile  
457 culture dish, weighed, and further processed to assess viral burden and tissue distribution or  
458 banked for future assays. Sampling of key organ systems suspected as potential tissue  
459 reservoirs for ZIKV and associated biological samples included the CNS (brain and eyes),  
460 urogenital, hematopoietic, and respiratory systems. A comprehensive listing of all specific  
461 tissues collected and analyzed is presented in **Table 1**.

462 ***Deep sequencing.*** Virus populations replicating in macaque plasma or mosquito saliva were  
463 sequenced in duplicate using a method adapted from Quick et. al.<sup>54</sup>. Viral RNA was isolated  
464 from mosquito saliva or plasma using the Maxwell 16 Total Viral Nucleic Acid Purification kit,  
465 according to manufacturer's protocol. Viral RNA then was subjected to RT-PCR using the  
466 SuperScript IV Reverse Transcriptase enzyme (Invitrogen, Carlsbad, CA). Input viral RNA  
467 ranged from 294 to 64745 viral RNA templates per cDNA reaction (**Supplementary Table 3**).  
468 The cDNA was then split into two multi-plex PCR reactions using the PCR primers described in  
469 Quick et. al with the Q5® High-Fidelity DNA Polymerase enzyme (New England Biolabs®, Inc.,  
470 Ipswich, MA). PCR products were tagged with the Illumina TruSeq Nano HT kit and sequenced  
471 with a 2 x 300 kit on an Illumina MiSeq.

472 **Sequence analysis.** Amplicon data were analyzed using a workflow we term “Zequencer 2017”  
473 (<https://bitbucket.org/dhoconno/zequencer/src>). Briefly, R1 and R2 fastq files from the paired-  
474 read Illumina miSeq dataset were merged, trimmed, and normalized using the bbtools package  
475 (<http://jgi.doe.gov/data-and-tools/bbtools>) and Seqtk (<https://github.com/lh3/seqtk>). Bbmerge.sh  
476 was used to merge reads, and to trim primer sequences by setting the forcetrimleft parameter  
477 22. All other parameters are set to default values. These reads were then mapped to the  
478 reference amplicon sequences with BBmap.sh. Reads substantially shorter than the amplicon  
479 were filtered out by reformat.sh (the minlength parameter was set to the length of the amplicon  
480 minus 60). Seqtk was used to subsample to 1000 reads per amplicon. Quality trimming was  
481 performed on the fastq file of normalized reads by bbmap’s reformat.sh (qtrim parameter set to  
482 ‘lr’, all other parameters set to default). Novoalign  
483 (<http://www.novocraft.com/products/novoalign/>) was used to map each read to ZIKV-  
484 PRVABC59 reference sequence KU501215. Novoalign’s soft clipping feature was turned off by  
485 specifying the parameter “-o FullNW”. Approximate fragment length was set to 300bp, with a  
486 standard deviation of 50. We used Samtools to map, sort, and create an mpileup of our reads  
487 (<http://samtools.sourceforge.net/>). Samtools’ base alignment quality (BAQ) computation was  
488 turned off; otherwise, default settings were used. SNP calling was performed with VarScan’s  
489 mpileupcns function (<http://varscan.sourceforge.net/>). The minimum average quality was set to  
490 30; otherwise, default settings were used. VCF files were annotated using SnpEff<sup>55</sup>. Accurate  
491 calling of end-of-read SNPs are a known weakness of current alignment algorithms<sup>56</sup>; in  
492 particular, Samtools’ BAQ computation feature is known to be a source of error when using  
493 VarScan (<http://varscan.sourceforge.net/germline-calling.html>). Therefore, both Novoalign’s  
494 soft clipping feature and Samtools’ BAQ were turned off to increase the accuracy of SNP calling  
495 for SNPs occurring at the end of a read.

496 **Evolutionary analysis.** The  $\pi$  statistic, which estimates pairwise nucleotide diversity over a  
497 specified sequence length (in this case, individual ZIKV genes) without regard to a reference,  
498 was calculated using the Variance-at-position script in the open-source PoPoolation 1.2.2<sup>57</sup>.  
499 Synonymous and nonsynonymous nucleotide diversity ( $\pi_N$  and  $\pi_S$ ) were calculated using the  
500 PoPoolation script syn-nonsyn-at-position. For all calculations, minimum coverage was set to  
501 100 and corrections were disabled.

502 **ZIKV NS1-specific enzyme-linked immunosorbent assay (ELISA).** IgM ZIKV-specific  
503 antibody responses were assessed using the Euroimmun diagnostic kit assay. Briefly, a 1:100  
504 dilution of macaque serum was performed in duplicate and added to the precoated plates. The  
505 assay was performed following the manufacturer's instructions, with photometric measurements  
506 taken at 450 nm.

507 **Statistical analyses.** The difference in time to peak viremia between animals sc-inoculated and  
508 animals infected by mosquito bite was assessed with a linear mixed effects model using the  
509 nlme package in R v. 3.3.2<sup>58</sup> with time to peak viremia as the response variable, route of  
510 infection as the explanatory variable, and animal ID as the random effect. The difference in peak  
511 viral loads between the two groups was analyzed with GraphPad Prism software and an  
512 unpaired Student's t-test was used to determine significant differences in viral loads. Differences  
513 in overall nucleotide diversity ( $\pi$ ) among study groups was analyzed in GraphPad Prism using  
514 one-way ANOVA with correction for multiple comparisons. Differences in synonymous and  
515 nonsynonymous diversity ( $\pi_N$  and  $\pi_S$ ) within groups were analyzed using Student's paired t-  
516 test in GraphPad Prism.

517 **Data availability.** Primary data that support the findings of this study are available at the Zika  
518 Open-Research Portal (<https://zika.labkey.com>). Zika virus/H.sapiens-tc/PUR/2015/PRVABC59-  
519 v3c2 sequence data have been deposited in the Sequence Read Archive (SRA) with accession

520 code SRX2975259. The authors declare that all other data supporting the findings of this study  
521 are available within the article and its supplementary information files, or from the corresponding  
522 author upon request.

## REFERENCES

1. Aliota, M. T. et al. Heterologous Protection against Asian Zika Virus Challenge in Rhesus Macaques. *PLoS Negl Trop Dis* **10**, e0005168 (2016).
2. Dudley, D. M. et al. A rhesus macaque model of Asian-lineage Zika virus infection. *Nat Commun* **7**, 12204 (2016).
3. Li, X. F. et al. Characterization of a 2016 Clinical Isolate of Zika Virus in Non-human Primates. *EBioMedicine* **12**, 170-177 (2016).
4. Koide, F. et al. Development of a Zika Virus Infection Model in Cynomolgus Macaques. *Front Microbiol* **7**, 2028 (2016).
5. Adams Waldorf, K. M. et al. Fetal brain lesions after subcutaneous inoculation of Zika virus in a pregnant nonhuman primate. *Nat Med* **22**, 1256-1259 (2016).
6. Abbink, P. et al. Protective efficacy of multiple vaccine platforms against Zika virus challenge in rhesus monkeys. *Science* **353**, 1129-1132 (2016).
7. Coffey, L. L. et al. Zika Virus Tissue and Blood Compartmentalization in Acute Infection of Rhesus Macaques. *PLoS One* **12**, e0171148 (2017).
8. Vanderberg, J. et al. Assessment of antibody protection against malaria sporozoites must be done by mosquito injection of sporozoites. *Am J Pathol* **171**, 1405-6; author reply 1406 (2007).
9. Thangamani, S. et al. Host immune response to mosquito-transmitted chikungunya virus differs from that elicited by needle inoculated virus. *PLoS One* **5**, e12137 (2010).
10. Leitner, W. W., Costero-Saint Denis, A. & Wali, T. Immunological consequences of arthropod vector-derived salivary factors. *Eur J Immunol* **41**, 3396-3400 (2011).
11. Smith, D. R. et al. Venezuelan equine encephalitis virus transmission and effect on pathogenesis. *Emerg Infect Dis* **12**, 1190-1196 (2006).
12. Styer, L. M. et al. Mosquitoes inoculate high doses of West Nile virus as they probe and feed on live hosts. *PLoS Pathog* **3**, 1262-1270 (2007).
13. Ribeiro, J. M. Role of saliva in blood-feeding by arthropods. *Annu Rev Entomol* **32**, 463-478 (1987).
14. Leitner, W. W., Costero-Saint Denis, A. & Wali, T. Role of immune cell subsets in the establishment of vector-borne infections. *Eur J Immunol* **42**, 3110-3115 (2012).
15. Pinggen, M., Schmid, M. A., Harris, E. & McKimmie, C. S. Mosquito Biting Modulates Skin

Response to Virus Infection. *Trends Parasitol* (2017).

16. Styer, L. M. et al. Mosquito saliva causes enhancement of West Nile virus infection in mice. *J Virol* **85**, 1517-1527 (2011).
17. Cox, J., Mota, J., Sukupolvi-Petty, S., Diamond, M. S. & Rico-Hesse, R. Mosquito bite delivery of dengue virus enhances immunogenicity and pathogenesis in humanized mice. *J Virol* **86**, 7637-7649 (2012).
18. Schmid, M. A. et al. Mosquito Saliva Increases Endothelial Permeability in the Skin, Immune Cell Migration, and Dengue Pathogenesis during Antibody-Dependent Enhancement. *PLoS Pathog* **12**, e1005676 (2016).
19. Fontaine, A. et al. Implication of haematophagous arthropod salivary proteins in host-vector interactions. *Parasit Vectors* **4**, 187 (2011).
20. Schneider, B. S. & Higgs, S. The enhancement of arbovirus transmission and disease by mosquito saliva is associated with modulation of the host immune response. *Trans R Soc Trop Med Hyg* **102**, 400-408 (2008).
21. Schneider, B. S. et al. Potentiation of West Nile encephalitis by mosquito feeding. *Viral Immunol* **19**, 74-82 (2006).
22. Conway, M. J. et al. Mosquito saliva serine protease enhances dissemination of dengue virus into the mammalian host. *J Virol* **88**, 164-175 (2014).
23. Pingen, M. et al. Host Inflammatory Response to Mosquito Bites Enhances the Severity of Arbovirus Infection. *Immunity* **44**, 1455-1469 (2016).
24. Nguyen, S. M. et al. Highly efficient maternal-fetal Zika virus transmission in pregnant rhesus macaques. *PLoS Pathog* **13**, e1006378 (2017).
25. Gubler, D. J. & Rosen, L. A simple technique for demonstrating transmission of dengue virus by mosquitoes without the use of vertebrate hosts. *Am J Trop Med Hyg* **25**, 146-150 (1976).
26. Osuna, C. E. et al. Zika viral dynamics and shedding in rhesus and cynomolgus macaques. *Nat Med* **22**, 1448-1455 (2016).
27. BOORMAN, J. P. & PORTERFIELD, J. S. A simple technique for infection of mosquitoes with viruses; transmission of Zika virus. *Trans R Soc Trop Med Hyg* **50**, 238-242 (1956).
28. Aliota, M. T., Peinado, S. A., Osorio, J. E. & Bartholomay, L. C. *Culex pipiens* and *Aedes triseriatus* Mosquito Susceptibility to Zika Virus. *Emerg Infect Dis* **22**, 1857-1859 (2016).
29. Aliota, M. T., Peinado, S. A., Velez, I. D. & Osorio, J. E. The wMel strain of *Wolbachia* Reduces Transmission of Zika virus by *Aedes aegypti*. *Sci Rep* **6**, 28792 (2016).
30. Lequime, S., Fontaine, A., Ar Gouilh, M., Moltini-Conclois, I. & Lambrechts, L. Genetic Drift, Purifying Selection and Vector Genotype Shape Dengue Virus Intra-host Genetic Diversity in Mosquitoes. *PLoS Genet* **12**, e1006111 (2016).
31. Grubaugh, N. D. et al. Genetic Drift during Systemic Arbovirus Infection of Mosquito Vectors Leads to Decreased Relative Fitness during Host Switching. *Cell Host Microbe* **19**,



- 481-492 (2016).
32. Grubaugh, N. D. et al. Genomic epidemiology reveals multiple introductions of Zika virus into the United States. *Nature* **546**, 401-405 (2017).
  33. Dzul-Manzanilla, F. et al. Evidence of vertical transmission and co-circulation of chikungunya and dengue viruses in field populations of *Aedes aegypti* (L.) from Guerrero, Mexico. *Trans R Soc Trop Med Hyg* **110**, 141-144 (2016).
  34. Miller, B. R., Monath, T. P., Tabachnick, W. J. & Ezike, V. I. Epidemic yellow fever caused by an incompetent mosquito vector. *Trop Med Parasitol* **40**, 396-399 (1989).
  35. Osorio, J. E., Godsey, M. S., Defoliart, G. R. & Yuill, T. M. La Crosse viremias in white-tailed deer and chipmunks exposed by injection or mosquito bite. *Am J Trop Med Hyg* **54**, 338-342 (1996).
  36. Hirsch, A. J. et al. Zika Virus infection of rhesus macaques leads to viral persistence in multiple tissues. *PLoS Pathog* **13**, e1006219 (2017).
  37. Aid, M. et al. Zika Virus Persistence in the Central Nervous System and Lymph Nodes of Rhesus Monkeys. *Cell* **169**, 610-620.e14 (2017).
  38. Villamil-Gomez, W. E. et al. Guillain-Barré syndrome during the Zika virus outbreak in Sucre, Colombia, 2016. *Travel Med Infect Dis* **16**, 62-63 (2017).
  39. Dos Santos, T. et al. Zika Virus and the Guillain-Barré Syndrome - Case Series from Seven Countries. *N Engl J Med* **375**, 1598-1601 (2016).
  40. Araujo, A. Q., Silva, M. T. & Araujo, A. P. Zika virus-associated neurological disorders: a review. *Brain* **139**, 2122-2130 (2016).
  41. Faria, N. R. et al. Zika virus in the Americas: Early epidemiological and genetic findings. *Science* **352**, 345-349 (2016).
  42. Ciota, A. T. et al. Effects of Zika Virus Strain and *Aedes* Mosquito Species on Vector Competence. *Emerg Infect Dis* **23**, 1110-1117 (2017).
  43. Aliota, M. T. et al. The wMel Strain of *Wolbachia* Reduces Transmission of Chikungunya Virus in *Aedes aegypti*. *PLoS Negl Trop Dis* **10**, e0004677 (2016).
  44. Musso, D. et al. Molecular detection of Zika virus in blood and RNA load determination during the French Polynesian outbreak. *J Med Virol* **89**, 1505-1510 (2017).
  45. Metsky, H. C. et al. Zika virus evolution and spread in the Americas. *Nature* **546**, 411-415 (2017).
  46. Halai, U. A. et al. Maternal Zika Virus Disease Severity, Virus Load, Prior Dengue Antibodies and their Relationship to Birth Outcomes. *Clin Infect Dis* (2017).
  47. BEARCROFT, W. G. Zika virus infection experimentally induced in a human volunteer. *Trans R Soc Trop Med Hyg* **50**, 442-448 (1956).
  48. Althouse, B. M. et al. Potential for Zika Virus to Establish a Sylvatic Transmission Cycle in the Americas. *PLoS Negl Trop Dis* **10**, e0005055 (2016).

49. Rogers, M. E., Ilg, T., Nikolaev, A. V., Ferguson, M. A. & Bates, P. A. Transmission of cutaneous leishmaniasis by sand flies is enhanced by regurgitation of fPPG. *Nature* **430**, 463-467 (2004).
50. Peters, N. C. et al. Vector transmission of leishmania abrogates vaccine-induced protective immunity. *PLoS Pathog* **5**, e1000484 (2009).
51. Sheehy, S. H. et al. ChAd63-MVA-vectored blood-stage malaria vaccines targeting MSP1 and AMA1: assessment of efficacy against mosquito bite challenge in humans. *Mol Ther* **20**, 2355-2368 (2012).
52. Christensen BM, S. D. R. *Brugia pahangi*: exsheathment and midgut penetration in *Aedes aegypti*. *Transactions of the American Microscopical Society* **103**, 423-433 (1984).
53. Lanciotti, R. S. et al. Genetic and serologic properties of Zika virus associated with an epidemic, Yap State, Micronesia, 2007. *Emerg Infect Dis* **14**, 1232-1239 (2008).
54. Quick, J. et al. Multiplex PCR method for MinION and Illumina sequencing of Zika and other virus genomes directly from clinical samples. *Nat Protoc* **12**, 1261-1276 (2017).
55. Cingolani, P. et al. A program for annotating and predicting the effects of single nucleotide polymorphisms, SnpEff: SNPs in the genome of *Drosophila melanogaster* strain w1118; iso-2; iso-3. *Fly (Austin)* **6**, 80-92 (2012).
56. Satya, R. V. & DiCarlo, J. Edge effects in calling variants from targeted amplicon sequencing. *BMC Genomics* **15**, 1073 (2014).
57. Kofler, R. et al. PoPoolation: a toolbox for population genetic analysis of next generation sequencing data from pooled individuals. *PLoS One* **6**, e15925 (2011).
58. Team, R. C. R: A language and environment for statistical computing. (2016).

## 523 **ACKNOWLEDGEMENTS**

524 The authors acknowledge Jens Kuhn and Jiro Wada for preparing silhouettes of macaques  
525 used in figures. We thank the Veterinary, Animal Care, Scientific Protocol Implementation, and  
526 the Pathology staff at the Wisconsin National Primate Research Center (WNPRC) for their  
527 contribution to this study. We also thank Emma Walker for assistance with the mouse  
528 experiments. Funding for this project came from DHHS/PHS/NIH R21AI131454 to M.T.A. and  
529 DHHS/PHS/NIH R01AI116382 to D.H.O; and from P51OD011106 awarded to the WNPRC,  
530 Madison, WI. This research was conducted in part at a facility that constructed with support from  
531 Research Facilities Improvement Program Grants RR15459-01 and RR020141-01. The

532 publication's contents are solely the responsibility of the authors and do not necessarily  
533 represent the official views of the NCRR or NIH.

#### 534 **AUTHOR CONTRIBUTIONS**

535 M.T.A., T.C.F., D.M.D., D.H.O., J.E.O., S.L.O., and C.M.N. designed experiments. D.M.D.,  
536 C.M.N., J.L., T.C.F., and M.T.A. analyzed data and drafted the manuscript. M.T.A. provided and  
537 prepared viral stocks, performed plaque assays, vector competence studies, mouse studies,  
538 and direct mosquito feeding studies. A.M.W., M.R.S., G.L.B., and T.C.F. developed and  
539 performed viral load assays. M.S.M., M.R.K., M.R.S., M.E.B., L.M.S., C.R.B., C.M.N., E.L.M.,  
540 and D.M.D. coordinated and processed macaque samples for distribution. K.R.Z. and S.L.O.  
541 developed and performed the deep sequencing pipeline. M.E.G. and M.R.K. maintained the  
542 Zika Open Portal site where data were stored and shared. N.S-D., E.P., S.C., and W.N.  
543 coordinated and performed macaque infections and sampling.

#### 544 **COMPETING FINANCIAL INTERESTS**

545 The authors declare no competing financial interests.

#### 546 **FIGURE LEGENDS**

547 **Figure 1. Longitudinal detection of Zika vRNA in plasma in subcutaneously inoculated**  
548 **animals (orange) or animals challenged via mosquito bite (blue).** Zika vRNA copies per ml  
549 blood plasma. The y-axis crosses the x-axis at the limit of quantification of the qRT-PCR assay  
550 (100 vRNA copies/ml).

551 **Figure 2. Viral titers and RNA loads in saliva of *Aedes aegypti* used to challenge**  
552 **macaques with ZIKV.** Mosquitoes were allowed to feed on ZIKV-infected mice. Twelve days  
553 later, mosquitoes were exposed to naive macaques. Immediately thereafter, mosquitoes were

554 examined to approximate the amount of virus delivered with mosquito saliva (n=40). Error bars  
555 represent 95% confidence interval for the mean.

556 **Figure 3. Detection of Zika vRNA in tissues in subcutaneously inoculated animals (gray)**  
557 **or animals challenged via mosquito bite (black).** qRT-PCR was used to assess the Zika viral  
558 burden and tissue distribution in subcutaneously inoculated animals versus animals challenged  
559 via mosquito bite. Orange symbols represent animals infected via subcutaneous injection and  
560 blue symbols represent animals that were infected via exposure to ZIKV-infected *Aedes aegypti*.  
561 Approximately 24 different tissues were assessed for the presence of viral RNA. Shown are the  
562 tissues with positive detection in at least one of the animals per group. The qRT-PCR assay has  
563 a quantification threshold of 3 copies/reaction.

564 **Figure 4. Single nucleotide polymorphisms in ZIKV populations infecting monkeys and**  
565 **mosquitoes in this study.** We used Illumina deep sequencing to characterize viral genomic  
566 diversity in **A.)** monkeys inoculated subcutaneously with ZIKV-PRVABC59 stock, **B.)**  
567 mosquitoes infected by feeding on ZIKV-infected *ifnar-/-* mice, and **C.)** monkeys infected via  
568 mosquito bite. Frequencies of SNPs detected in the stock virus isolate are plotted in each panel  
569 for reference. Viruses infecting monkeys were sequenced at the time of peak plasma viremia:  
570 day 3 post-infection in sc-inoculated animals and days 5 or 6 post-feeding in mosquito-bitten  
571 animals. Plotted frequencies represent the average of 2 technical replicates for each sample.

## 572 TABLES

573 **Table 1. Vector competence of *Aedes aegypti* used to challenge macaques with ZIKV.**

|                                                    |                        |                        |
|----------------------------------------------------|------------------------|------------------------|
| <b>12 days post feeding on ZIKV-infected mouse</b> |                        |                        |
| <b>I</b>                                           | <b>D</b>               | <b>T</b>               |
| <b>36/40<br/>(90%)</b>                             | <b>33/40<br/>(83%)</b> | <b>10/40<br/>(25%)</b> |

574 I, % Infected; D, % Disseminated; T, % Transmitting

575 **Table 2. Complete list of tissues examined for ZIKV RNA**

|                     | 566628 | 311413 | 268283 | 328696 | 349322 | 458001 |
|---------------------|--------|--------|--------|--------|--------|--------|
| axillary LN         | +      | +      | +      | +      | +      | +      |
| mesenteric LN       | +      | +      | +      | +      | +      | +      |
| submandibular LN    | +      | +      | +      | +      | +      | +      |
| tracheobroncheal LN | -      | +      | -      | -      | +      | -      |
| inguinal LN         | +      | +      | -      | +      | ND     | +      |
| pelvic LN           | +      | +      | +      | +      | +      | +      |
| spleen              | +      | +      | +      | +      | +      | -      |

|                    |    |   |    |    |    |   |
|--------------------|----|---|----|----|----|---|
| lung               | -  | - | -  | -  | -  | - |
| liver              | +  | + | +  | +  | +  | + |
| kidney             | +  | + | -  | +  | -  | + |
| bone marrow        | +  | + | +  | -  | -  | - |
| cerebrum           | +  | - | -  | -  | -  | - |
| eyelid conjunctiva | +  | - | -  | -  | -  |   |
| optic nerve        | -  | - | -  | -  | -  | - |
| aqueous humor      | -  | - | -  | -  | -  | - |
| sclera retina      | -  | + | -  | -  | -  | - |
| cervix             | ND | + | ND | ND | ND | + |
| uterus             | ND | + | ND | ND | ND | - |
| ovarian follicle   | ND | - | ND | ND | ND | - |
| ovary              | ND | - | ND | ND | ND | - |

|                 |    |    |    |    |    |    |
|-----------------|----|----|----|----|----|----|
| vagina          | ND | +  | ND | ND | ND | +  |
| seminal vesicle | -  | ND | -  | -  | -  | ND |
| testicle        | -  | ND | -  | -  | -  | ND |
| prostate        | -  | ND | -  | -  | -  | ND |

576 +, ZIKV RNA detected (see Figure 3 for values); -, ZIKV RNA below the limit of detection; LN,  
 577 lymph node; ND, no data.

578 **Table 3. Vector competence of *Aedes aegypti* following peroral exposure to ZIKV-infected**  
 579 **macaques.**

| Zika virus        | 7 days post feeding |              |           | 13 days post feeding |              |              | 25 days post feeding |              |              |
|-------------------|---------------------|--------------|-----------|----------------------|--------------|--------------|----------------------|--------------|--------------|
|                   | I                   | D            | T         | I                    | D            | T            | I                    | D            | T            |
| Needle-inoculated | 0/30<br>(0%)        | 0/30<br>(0%) | 0/30 (0%) | 0/40<br>(0%)         | 0/40<br>(0%) | 0/40<br>(0%) | 0/29 (0%)            | 0/29<br>(0%) | 0/29<br>(0%) |
| Mosquito-bite     | ND                  | ND           | ND        | 0/30<br>(0%)         | 0/30<br>(0%) | 0/30<br>(0%) | 1/26<br>(4%)         | 1/26<br>(4%) | 0/26<br>(0%) |

580 I, % Infected; D, % Disseminated; T, % Transmitting; ND, No Data.





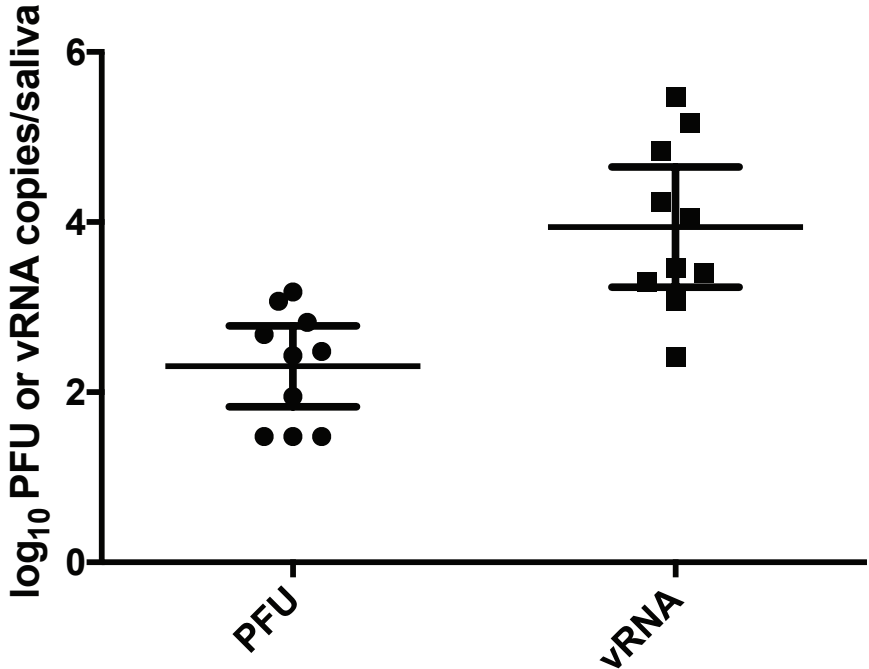

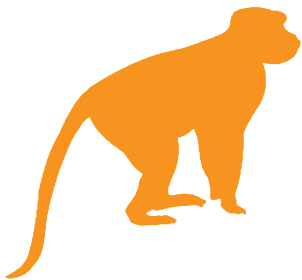

- 566628
- 311413

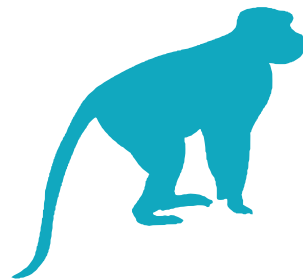

- 268283
- 328696
- 349322
- 458001

Subcutaneous inoculation

Mosquito-bite inoculation

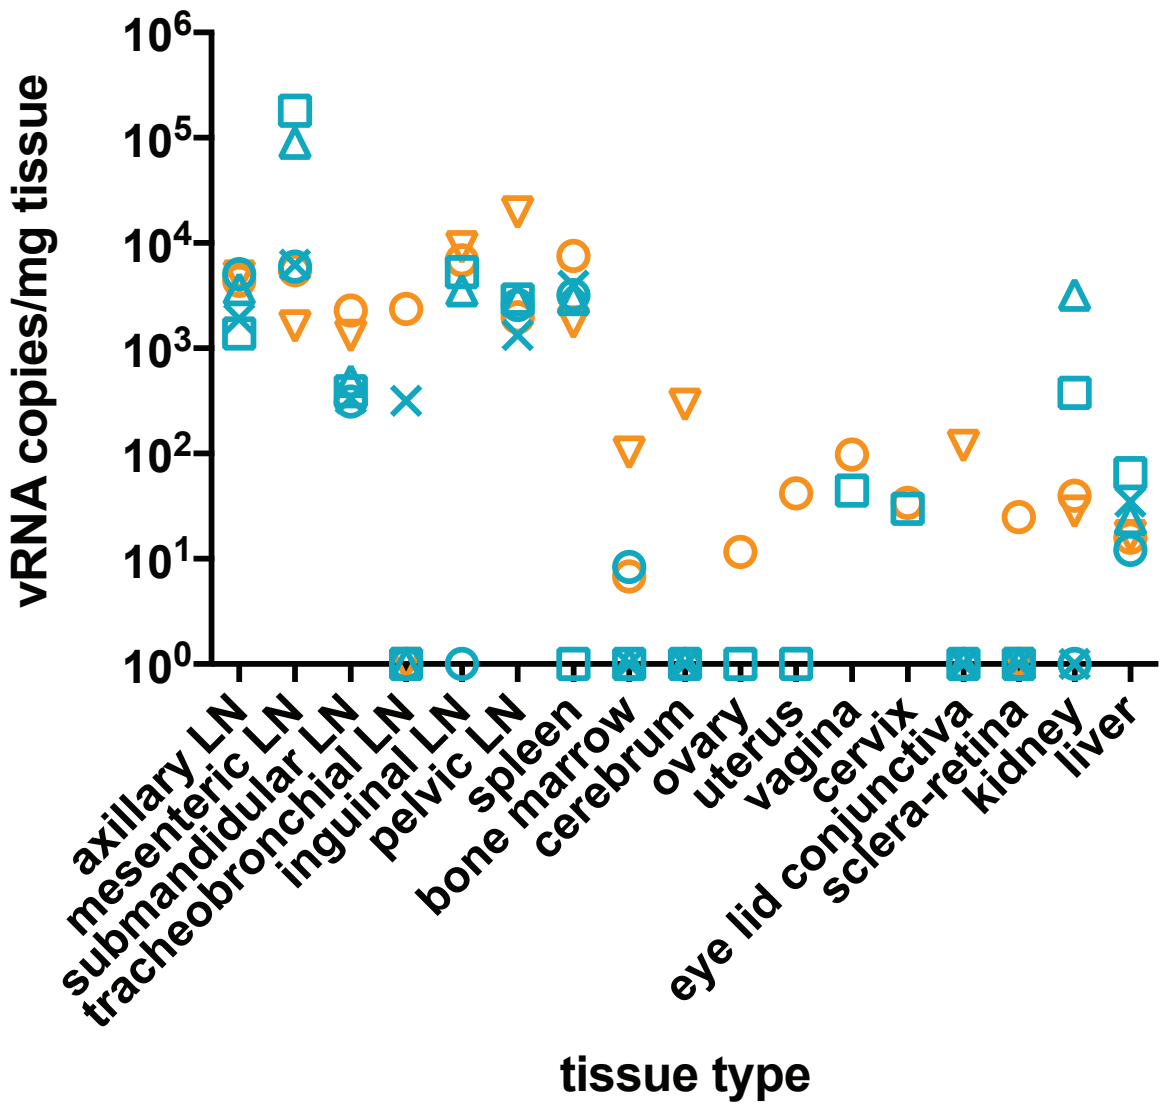

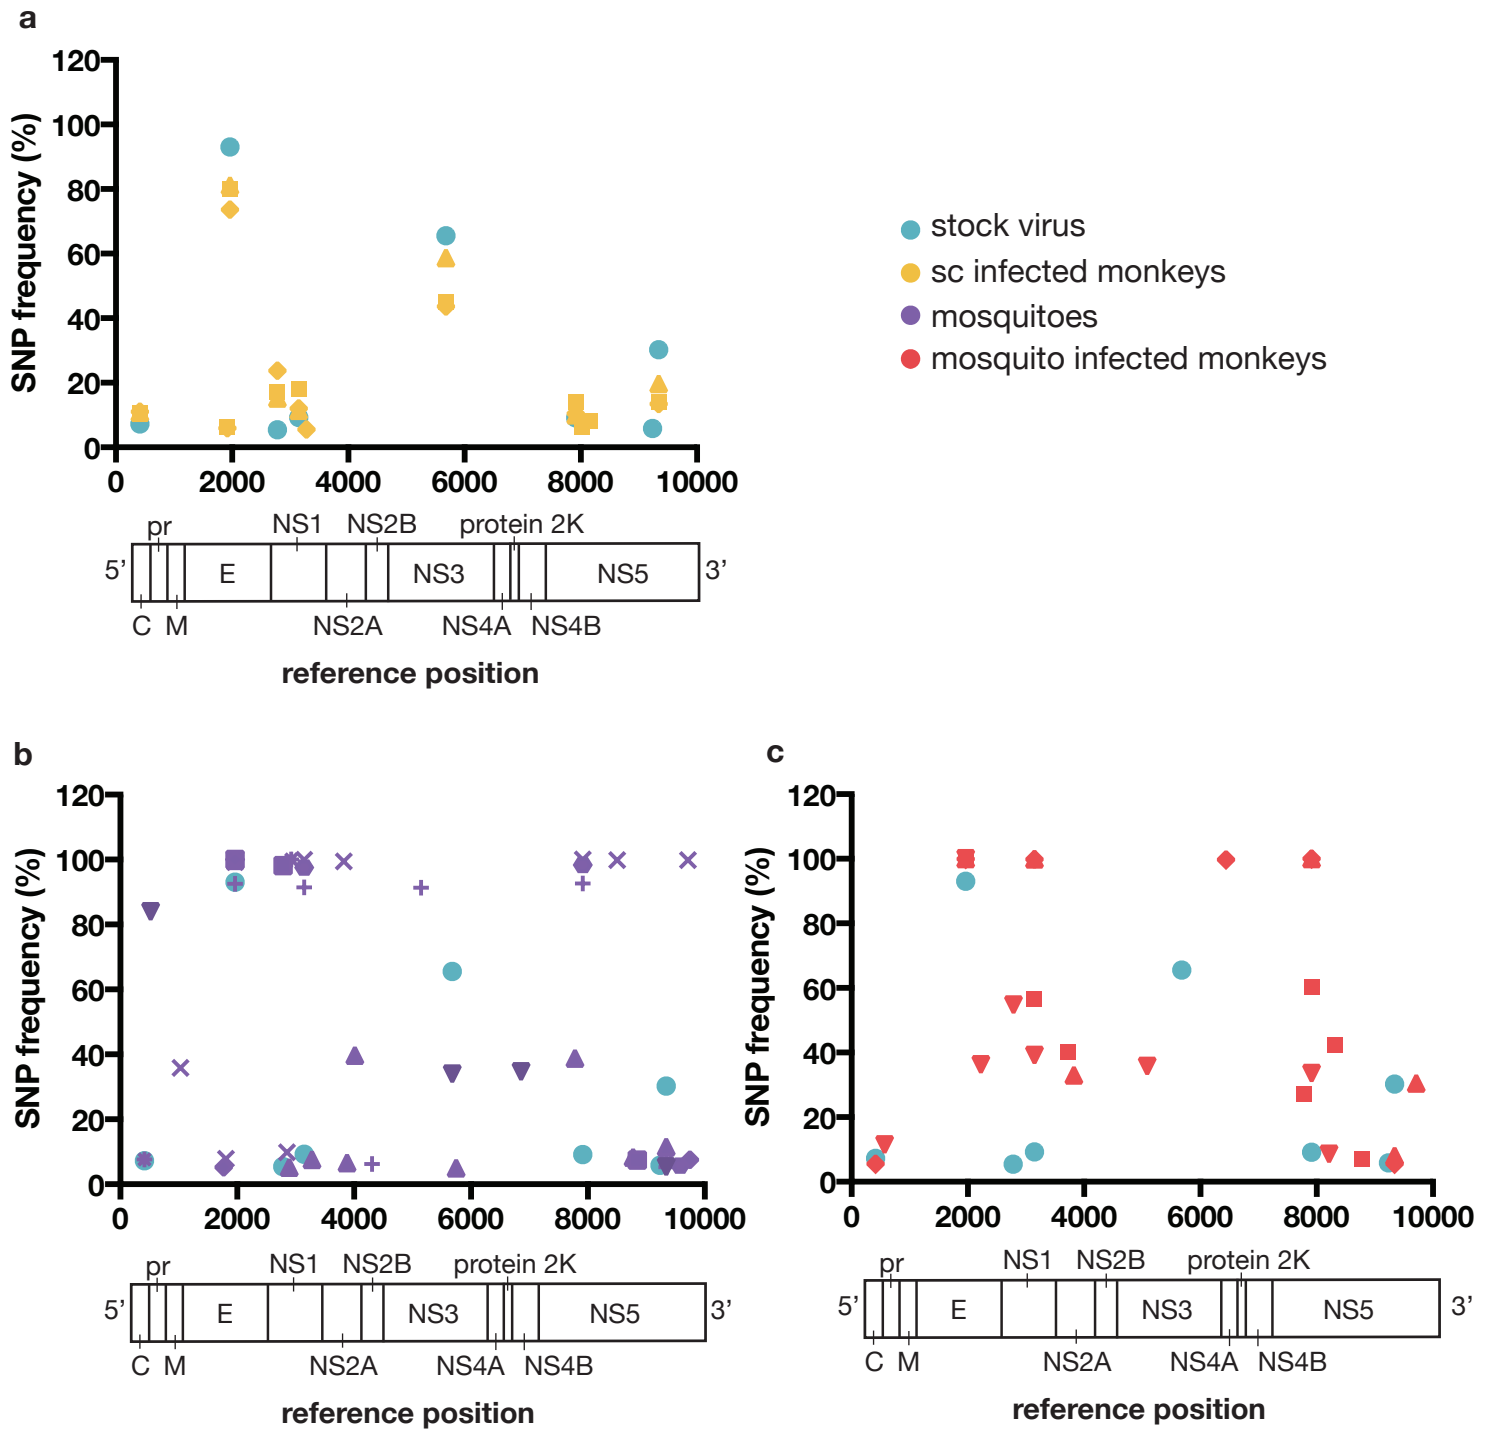

Source: http://www.biorxiv.org/content/10.1101/186155v1.full.pdf
